# Supplementary material for: High-surface energy enables efficient and stable photocatalytic toluene degradationviathe suppression of intermediate byproducts
Source: Royal Society of Chemistry journal article supplement (doi:10.1039/c9cy00308h), 2019-01-01
Supplement: c9cy00308h1.pdf [file c9cy00308h1.pdf]

## **Electronic Supplementary Information for**

# **High surface energy enables efficient and stable photocatalytic toluene degradation via the suppression of intermediate byproducts**

**Hong Wang,<sup>a,b</sup> Xing'an Dong,<sup>a,b</sup> Wen Cui,<sup>b,c</sup> Jieyuan Li,<sup>b,d</sup> Yanjuan Sun,<sup>a,b</sup> Ying  
Zhou,<sup>c</sup> Hongwei Huang,<sup>e</sup> Yuxin Zhang,<sup>f</sup> Fan Dong<sup>\*a,b</sup>**

a Chongqing Key Laboratory of Catalysis and New Environmental Materials, College of Environment and Resources, Chongqing Technology and Business University, Chongqing 400067, China.

b Research Center for Environmental Science & Technology, Institute of Fundamental and Frontier Sciences, University of Electronic Science and Technology of China, Chengdu 611731, China.

c The Center of New Energy Materials and Technology, School of Materials Science and Engineering, Southwest Petroleum University, Chengdu 610500, China.

d College of Architecture and Environment, Sichuan University, Chengdu, Sichuan 610065, China.

e National Laboratory of Mineral Materials, School of Materials Science and Technology, China University of Geosciences, Beijing 100083, China.

f College of Materials Science and Engineering, Chongqing University, Chongqing 400045, China.

\*Corresponding Author:

Email Address: dfctbu@126.com (Fan Dong)

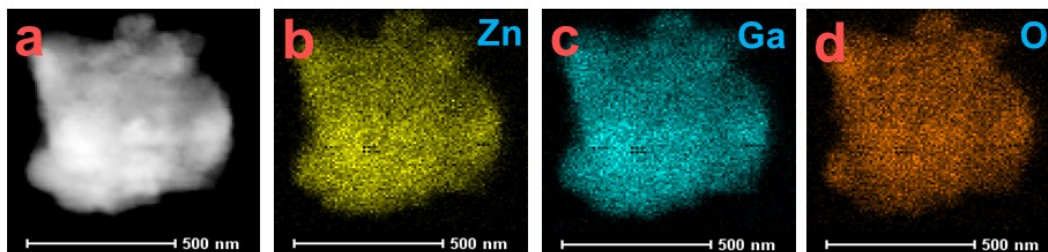

**Fig. S1** TEM-EDX elemental mapping of Zn (a), Ga (b) and O (c) in  $\text{ZnGa}_2\text{O}_4$ .

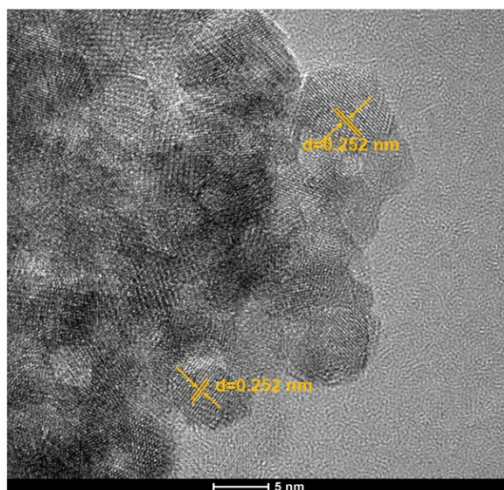

**Fig. S2** The enlarged version of HRTEM of  $\text{ZnGa}_2\text{O}_4$ -100.

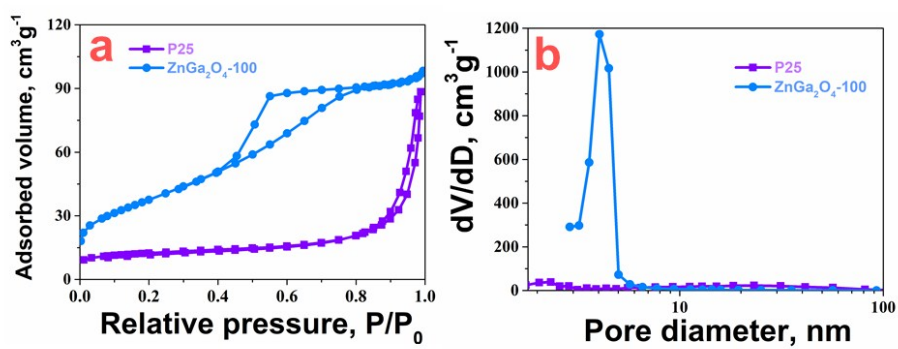

**Fig. S3**  $\text{N}_2$  adsorption-desorption isotherms (a) and pore size distribution curves (b) of P25 and  $\text{ZnGa}_2\text{O}_4$ -100.

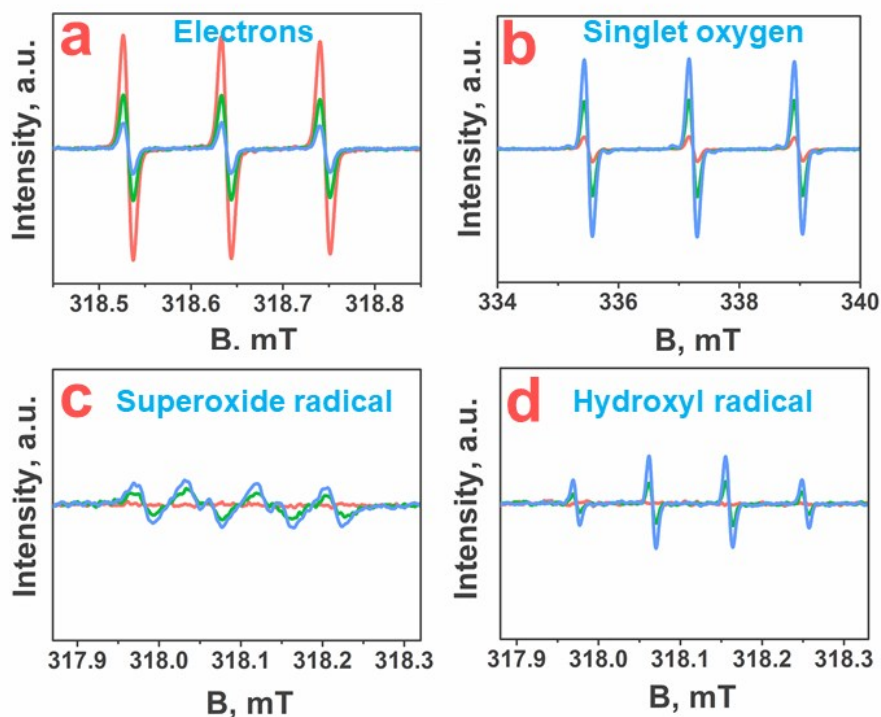

**Fig. S4** Spin-trapping ESR spectra under UV irradiation for 0, 5 and 15 min (corresponding red, green and blue line) using different trapping agents in the presence of P25.

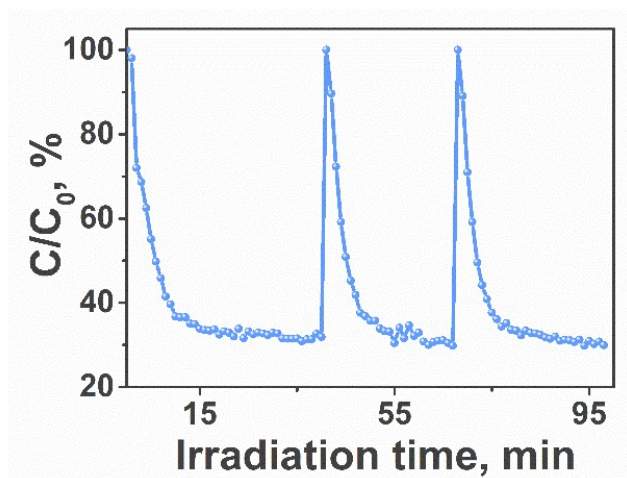

**Fig. S5** Photocatalytic stability of  $\text{ZnGa}_2\text{O}_4\text{-100}$  for the oxidation removal of toluene in air.
